# Supplementary material for: AIE-active, highly thermally and morphologically stable, mechanochromic and efficient solid emitters for low color temperature OLEDs
Source: Royal Society of Chemistry journal article supplement (doi:10.1039/c4tc00915k), 2014-01-01
Supplement: c4tc00915k1.pdf [file c4tc00915k1.pdf]

*Electronic Supplementary Information*

**AIE-active, highly thermally and morphologically stable, mechanochromic and efficient solid emitters for low color temperature OLEDs**

Yongyang Gong,<sup>a</sup> Jun Liu,<sup>b</sup> Yiren Zhang,<sup>a</sup> Gufeng He,<sup>b</sup> Yang Lu,<sup>a</sup> Wen Bin Fan,<sup>a</sup> Wang Zhang Yuan,<sup>\*a</sup>

Jing Zhi Sun<sup>c</sup> and Yongming Zhang<sup>\*a</sup>

<sup>a</sup> School of Chemistry and Chemical Engineering, Shanghai Key Lab of Electrical Insulation and Thermal Aging, Shanghai Jiao Tong University, Shanghai 200240, China

<sup>b</sup> National Engineering Lab for TFT-LCD Materials and Technologies, Department of Electronic Engineering, Shanghai Jiao Tong University, Shanghai 200240, China

<sup>c</sup> Department of Polymer Science and Engineering, Zhejiang University, Hangzhou 310027, China

**Table of Contents**

**Fig. S1** Photographs of isolated BPA2TPAN and BNA2TPAN on TLC plates under (A) 254 and (B) 365-nm UV light irradiation after being developed in 1/1 petroleum ether-dichloromethane mixture.

**Fig. S2** HRMS spectrum of BPA2TPAN.

**Fig. S3** HRMS spectrum of BNA2TPAN.

**Fig. S4** Size distribution of BPA2TPAN suspensions in 10/90 THF-water mixture. Abbreviations:  $D_m$  = mean diameter, PD = polydispersity.

**Fig. S5** Size distribution of BNA2TPAN suspensions in 10/90 THF-water mixture. Abbreviations:  $D_m$  = mean diameter, PD = polydispersity.

**Table S1** Solution photoluminescence quantum yields ( $\Phi_{F,s}$ ) of the luminogens in THF<sup>a</sup>.

**Fig. S6** CIE coordinates and color temperature of the ground solid powders of BPA2TPAN and BNA2TPAN.

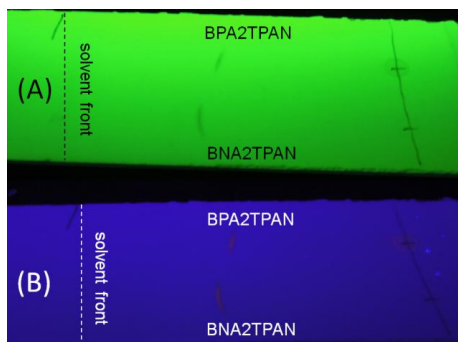

**Fig. S1** Photographs of isolated BPA2TPAN and BNA2TPAN on TLC plate under (A) 254 and (B) 365-nm UV light irradiation after being developed in 1/1 petroleum ether-dichloromethane mixture.

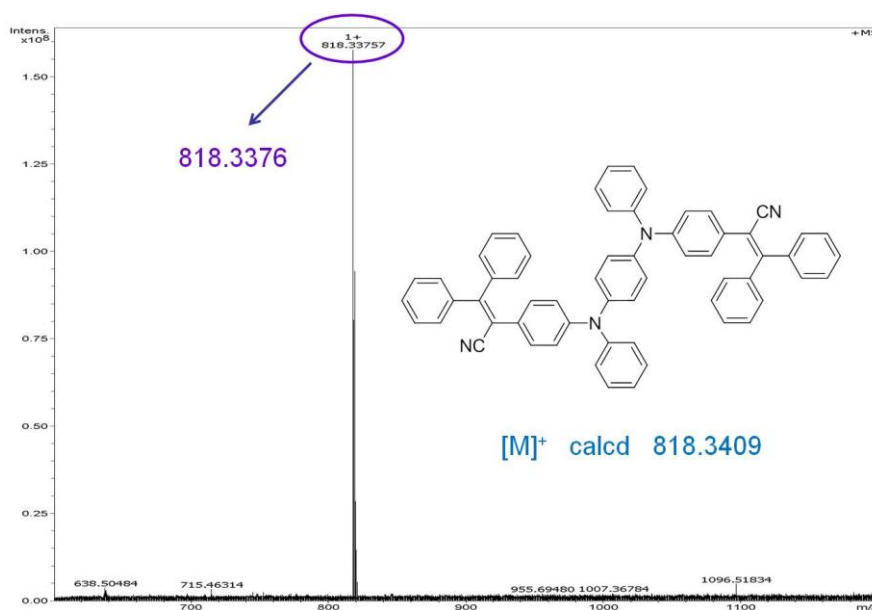

**Fig. S2** HRMS spectrum of BPA2TPAN.

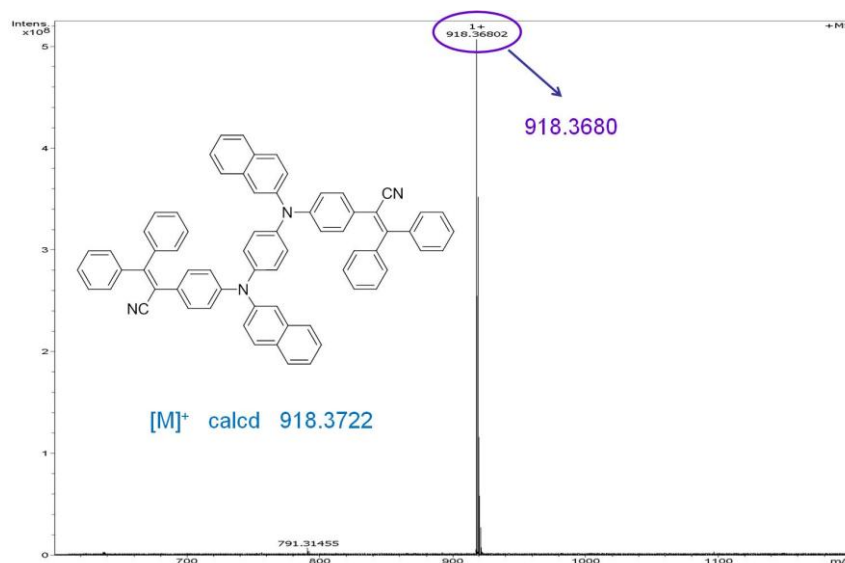

**Fig. S3** HRMS spectrum of BNA2TPAN.

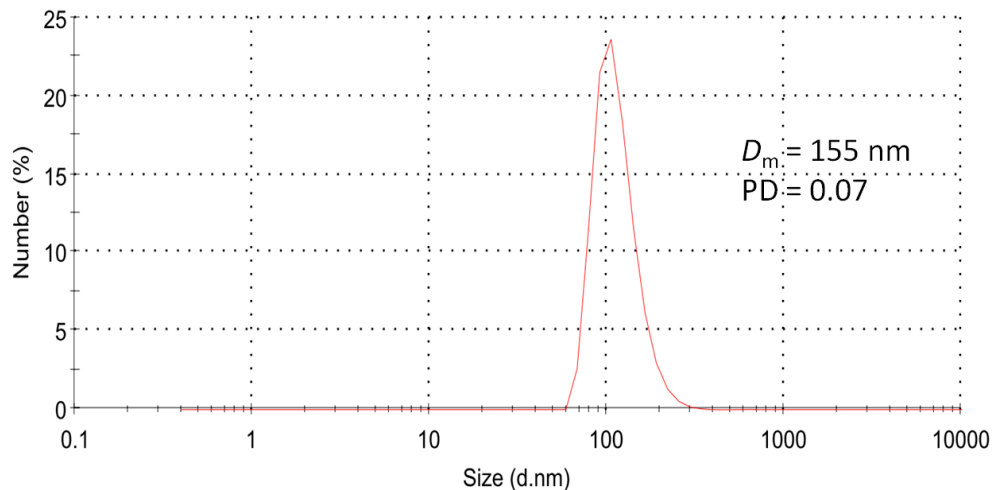

**Fig. S4** Size distribution of BPA2TPAN suspensions in 10/90 THF-water mixture. Abbreviations:  $D_m$  = mean diameter, PD = polydispersity.

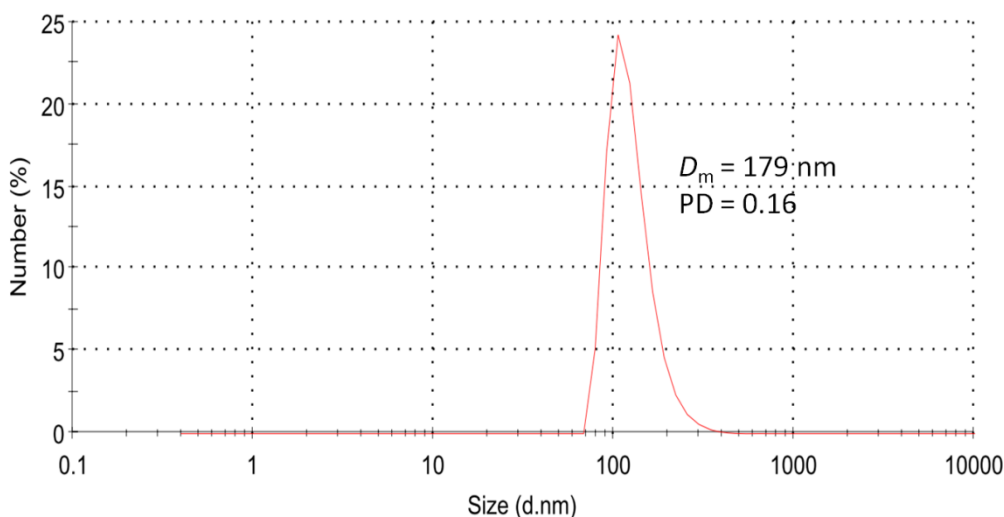

**Fig. S5** Size distribution of BNA2TPAN suspensions in 10/90 THF-water mixture. Abbreviations:  $D_m$  = mean diameter, PD = polydispersity.

**Table S1** Solution photoluminescence quantum yields ( $\Phi_{F,s}$ ) of the luminogens in THF<sup>a</sup>.

| No.       | BPA2TPAN          |                 | BNA2TPAN          |                 |
|-----------|-------------------|-----------------|-------------------|-----------------|
|           | $\lambda_{ex}/nm$ | $\Phi_{F,s}/\%$ | $\lambda_{ex}/nm$ | $\Phi_{F,s}/\%$ |
| 1         | 364               | 0.09            | 367               | 0.11            |
| 2         | 370               | 0.10            | 370               | 0.13            |
| 3         | 374               | 0.10            | 375               | 0.15            |
| 4         | 370               | 0.08            | 370               | 0.11            |
| $\bar{x}$ | —                 | 0.09            | —                 | 0.12            |
| $S$       | —                 | 0.01            | —                 | 0.04            |

<sup>a</sup>  $\lambda_{ex}$  = excitation wavelength;  $\bar{x}$  = the mean value of  $\Phi_{F,s}$ ;  $S = \sqrt{\frac{\sum_{i=1}^n (x_i - \bar{x})^2}{n-1}}$  (corrected sample standard deviation).

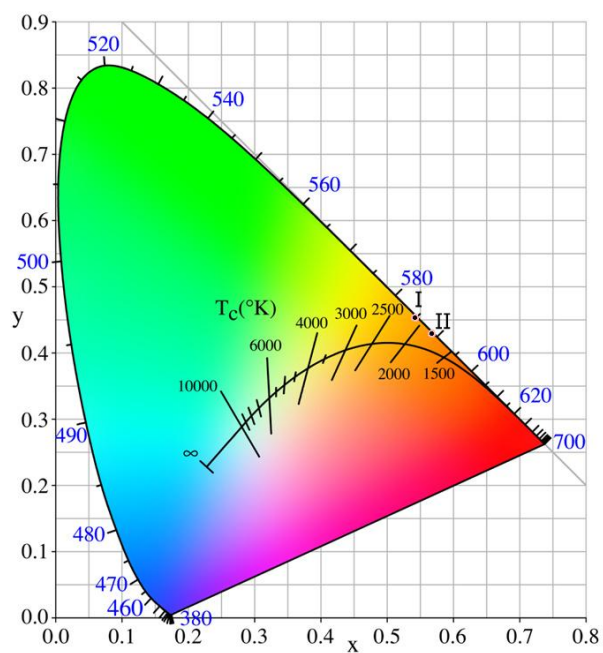

**Fig. S6** CIE coordinates and color temperature of the ground solid powders of BPA2TPAN and BNA2TPAN.
